# Supplementary material for: Pharmacogenomic Biomarkers in Docetaxel Treatment of Prostate Cancer: From Discovery to Implementation
Source: Genes (Basel). 2019 Aug 8;10(8):599. doi: 10.3390/genes10080599 (PMC6723793; doi:10.3390/genes10080599)
Supplement: Supplementary file 1 [file genes-10-00599-s001.pdf]

Supplementary table 1. Withdrawn clinical trials and clinical trials with unknown status for docetaxel treatment in prostate cancer (ClinicalTrials.gov)

| NCT Number  | Title                                                                                       | Status                                  | Results | Interventions                                                   | Pharmacogenomic analyses                                                                                                                                                         | Phase | Participants | Study Type     |
|-------------|---------------------------------------------------------------------------------------------|-----------------------------------------|---------|-----------------------------------------------------------------|----------------------------------------------------------------------------------------------------------------------------------------------------------------------------------|-------|--------------|----------------|
| NCT00598858 | Neoadjuvant Docetaxel on Newly Diagnosed Intermediate and High Grade Cancer of the Prostate | Withdrawn (lack of funding)             | No      | docetaxel + prednisone                                          | Genomic factors affecting responses to chemotherapy.                                                                                                                             | II    | 0            | Interventional |
| NCT01087580 | Docetaxel + Prednisone With or Without Radiation for Castrate Resistant Prostate Cancer     | Withdrawn                               | No      | docetaxel + prednisone or docetaxel + prednisone + radiotherapy | Identification of genes important in governing the response to chemotherapy and radiation therapy. Expression and mutation of p53 and AR.                                        | II    | 0            | Interventional |
| NCT02793219 | Provenge Followed by Docetaxel in Castration-Resistant Prostate Cancer                      | Withdrawn (company decided not to fund) | No      | sipuleucel-T + docetaxel                                        | Association of immunological biomarkers with clinical results for therapy. Expression of CD3, CD4, CD8, CD25/FOX3P, CD56, CTLA-4, PD-1, and Ki67 in prostate cancer infiltrates. | II    | 0            | Interventional |
| NCT02793765 | Docetaxel Followed by Provenge in Metastatic Prostate Cancer                                | Withdrawn (company decided not to fund) | No      | docetaxel + sipuleucel-T                                        | Association of immunological biomarkers with clinical results for therapy. Expression of CD3, CD4, CD8, CD25/FOX3P, CD56, CTLA-4, PD-1, and Ki67 in prostate cancer infiltrates. | II    | 0            | Interventional |

|             |                                                                                                             |                |    |                                                                                   |                                                                                                                                                                                                                               |     |                 |                |
|-------------|-------------------------------------------------------------------------------------------------------------|----------------|----|-----------------------------------------------------------------------------------|-------------------------------------------------------------------------------------------------------------------------------------------------------------------------------------------------------------------------------|-----|-----------------|----------------|
| NCT00104715 | Hormone Therapy and Docetaxel or Hormone Therapy Alone in Treating Patients With Metastatic Prostate Cancer | Unknown status | No | hormonal therapy + docetaxel or hormonal therapy alone                            | Tumor profiles of gene expression                                                                                                                                                                                             | III | 378 (estimated) | Interventional |
| NCT02208583 | Molecular Phenotype Changes and Personalized Treatment for CRPC                                             | Unknown status | No | docetaxel + prednisone + targeted drugs or cisplatin + etoposide + targeted drugs | Molecular phenotypic changes after acquired ADT resistance and their effect on OS (AR,Ki-67, CD56, Syn, P53, AURKA, N-myc, retinoblastoma susceptibility, E-cadherin, vimentin, hotspot mutation for 48 cancer related genes) | NA  | 150 (estimated) | Interventional |

AR, androgen receptor  
ADT, androgen deprivation therapy  
OS, overall survival
